# Supplementary material
Source: HighWire-hosted journal article supplement (https://ejhp.bmj.com/highwire/filestream/150336/field_highwire_adjunct_files/2/ejhpharm-2021-002747supp003_data_supplement.pdf)
Supplement: ejhpharm-2021-002747supp003_data_supplement.pdf [file ejhpharm-2021-002747supp003_data_supplement.pdf]

**SUPPLEMENTARY FILE 3**

**Filled in checklist of Hospital pharmacy 3.**

Checklist, see page 2 - 6

|                                    |                                             |
|------------------------------------|---------------------------------------------|
| hospital pharmacy: <b>Number 3</b> | date of the assessment: <b>May 25, 2020</b> |
|------------------------------------|---------------------------------------------|

Risk reduction and Remaining risk, listed in the checklist, were the mean results after the initial audits in the nine participating hospital pharmacies.

D, detection; LAF, laminar airflow cabinet; O, occurrence; SC, safety cabinet.

#### A: Air inside LAF/SC

**Risk reduction:** LAF/SC checked once or twice a year by particle measurements, airflow velocity and HEPA filter integrity in at rest\* condition. Daily monitoring by settle plate.

| Remaining risk                                                                                                                        | O  | D   |
|---------------------------------------------------------------------------------------------------------------------------------------|----|-----|
| 1. Chance of environment around work zone* at rest not in accordance with Grade A air*.<br>Additional risk reduction:                 |    |     |
| • non-viable particle counting in work zone at rest at least quarterly                                                                |    | - 1 |
| 2. Materials and equipment disturb the unidirectional flow* and can block first air* at critical spots*<br>Additional risk reduction: |    |     |
| • correct position of materials after investigations by airflow visualization in worst case situation                                 |    | -1  |
| • position of materials is regularly audited and both operators correct each other                                                    | -1 | -1  |

\* see definitions

#### B: Worktop LAF/SC

**Risk reduction:** Disinfection before each work session by wiping with ethanol or isopropyl alcohol 70% impregnated wipes; daily monitoring by contact plate.

| Remaining risk                                                                                               | O  | D  |
|--------------------------------------------------------------------------------------------------------------|----|----|
| 1. Disinfection forgotten; contamination by materials used during preparation.<br>Additional risk reduction: |    |    |
| • Disinfection at the beginning of a working day is registered in a log.                                     |    | -1 |
| • Disinfection before each new prepared dosage form.                                                         | -1 |    |
| • Disinfection before each new prepared dosage form is regularly audited.                                    | -1 | -1 |

**C: Wall and ceiling LAF/SC**

**Risk reduction:** Daily surface disinfection by wiping with ethanol or isopropyl alcohol 70% impregnated wipes.

| Remaining risk                                                           | O | D  |
|--------------------------------------------------------------------------|---|----|
| 1. Disinfection forgotten.                                               |   |    |
| Additional risk reduction:                                               |   |    |
| • Disinfection at the beginning of a working day is registered in a log. |   | -1 |

**D1: Materials with a sterile surface (sterile medical devices and infusion bags)**

**Risk reduction:** Unwrapping in front of LAF/SC.

| Remaining risk                                                                                        | O  | D  |
|-------------------------------------------------------------------------------------------------------|----|----|
| 1. Contaminated outer layer.                                                                          |    |    |
| Additional risk reduction:                                                                            |    |    |
| • All operators in background area* (and anteroom*) wear disposable (sterile) gloves.                 | -1 |    |
| • Unpack original boxes in front of the lock with gloved hands, put materials directly into the lock. | -1 |    |
| • Use materials directly and/or store materials in closed cupboards.                                  | -1 |    |
| • Transfer and storage are audited at least yearly.                                                   |    | -1 |
| 2. Parts of outer layer inside LAF/SC.                                                                |    |    |
| Additional risk reduction:                                                                            |    |    |
| • Aseptic transfer into LAF/SC by presentation.                                                       | -1 |    |
| • Aseptic transfer is regularly audited and both operators correct each other.                        | -1 | -1 |

\* see definitions

**D2: Critical spots\* (syringe tips, needles and the opening of tubes)**

| Remaining risk                                                              | O  | D  |
|-----------------------------------------------------------------------------|----|----|
| 1. Contact of critical spots with the work top of LAF/SC.                   |    |    |
| Additional risk reduction:                                                  |    |    |
| • Putting down syringes, needles and open tubes on a sterile pad in LAF/SC. | -2 |    |
| • Use of sterile pad is regularly audited.                                  | -1 | -1 |
| • Both operators correct each other.                                        |    | -1 |

\* see definitions

**E1: Materials and equipment with a non-sterile surface (ampoules, vials, bottles)**

Risk reduction: Disinfection by wiping with ethanol or isopropyl alcohol 70%.

| Remaining risk                                                                                          | O  | D  |
|---------------------------------------------------------------------------------------------------------|----|----|
| 1. High surface bioburden before disinfection.<br>Additional risk reduction:                            |    |    |
| • Transfer ampoules and vials in their original boxes into the background area*.                        | -1 |    |
| • Store materials not directly used in their original boxes in the background area in closed cupboards. | -1 |    |
| • Periodical surface bioburden determination before disinfection.                                       |    | -1 |
| • Transfer and storage are audited at least yearly.                                                     |    | -1 |
| 2. Disinfection improperly done.<br>Additional risk reduction:                                          |    |    |
| • Thorough wiping by completely impregnated wipes.                                                      | -1 |    |
| • Disinfection by a validated disinfection procedure.                                                   | -1 |    |
| • Regular surface monitoring of disinfected materials.                                                  |    | -2 |
| • Disinfection is regularly audited and both operators correct each other.                              | -1 | -1 |
| c. Recontamination of disinfected materials.<br>Additional risk reduction:                              |    |    |
| • Measures to prevent recontamination.                                                                  | -1 |    |
| • Measures to prevent changing disinfected and non-disinfected materials.                               | -1 |    |
| • Measures are regularly audited and both operators correct each other.                                 | -1 | -1 |

\* see definitions

**E2: Critical spots\* (vial stoppers and ampoule necks)**

Risk reduction: Additional disinfection in LAF/SC by wiping with sterile ethanol or isopropyl alcohol 70%.

| Remaining risk                                                                                                    | O  | D  |
|-------------------------------------------------------------------------------------------------------------------|----|----|
| 1. Additional disinfection improperly done.<br>Additional risk reduction:                                         |    |    |
| • Precisely described and improved additional disinfection technique (thorough wiping and > 30 sec waiting time). | -1 |    |
| • Additional disinfection is regularly audited.                                                                   | -1 | -1 |
| • Both operators correct each other.                                                                              |    | -1 |

\* see definitions

**F: Operator's hands**

**Risk reduction:** Sterile gloves, which are changed at least every hour; daily glove print by settle plate.

| Remaining risk                                                                                        | O  | D  |
|-------------------------------------------------------------------------------------------------------|----|----|
| 1. Glove damage.                                                                                      |    |    |
| Additional risk reduction:                                                                            |    |    |
| • Check gloves integrity immediately after putting them on and during processing.                     | -1 |    |
| • Glove handling is regularly audited.                                                                | -1 | -1 |
| • Both operators correct each other.                                                                  |    | -1 |
| 2. Surface contamination during putting on gloves.                                                    |    |    |
| Additional risk reduction:                                                                            |    |    |
| • Good putting on technique.                                                                          | -1 |    |
| • Putting on gloves is regularly audited.                                                             | -1 | -1 |
| • Both operators correct each other.                                                                  |    | -1 |
| 3. Surface contamination during preparation.                                                          |    |    |
| Additional risk reduction:                                                                            |    |    |
| • Glove disinfection before start of each new preparation and every 15 min during a long preparation. | -2 |    |
| • Glove disinfection is regularly audited and both operators correct each other.                      | -1 | -1 |

**G: Operator's forearm**

**Risk reduction:** Wearing cleanroom clothing which is changed every day.

| Remaining risk                                                              | O  | D  |
|-----------------------------------------------------------------------------|----|----|
| 1. Surface contamination of the worktop.                                    |    |    |
| Additional risk reduction:                                                  |    |    |
| • Operator wears sterile sleeves which must be changed after every session. | -2 | -1 |

**H: Working procedure**

**Risk reduction:** Working with two operators during processing; SOPs; operators trained in aseptic techniques; aseptic process simulation with a broth solution.

| Remaining risk                                                          | O  | D  |
|-------------------------------------------------------------------------|----|----|
| 1. Deviation from SOPs.<br>Additional risk reduction:                   |    |    |
| • Accurate and up to date SOPs (enough details, univocal text).         | -1 |    |
| • Working according to SOPs is regularly audited.                       | -1 | -1 |
| • Both operators correct each other.                                    |    | -1 |
| 2. Touching critical spots*.<br>Additional risk reduction:              |    |    |
| • Additional training in non-touch working.                             | -1 |    |
| • Non-touch working is regularly audited.                               | -1 | -1 |
| • Both operators correct each other.                                    |    | -1 |
| 3. Blocking first air* at critical spots.<br>Additional risk reduction: |    |    |
| • Prevention of blocking first air is regularly audited.                | -1 | -1 |
| • Both operators correct each other.                                    |    | -1 |

\* see definitions
